1 **Stochastic modeling of aging cells reveals how damage accumulation,**  
2 **repair, and cell-division asymmetry affect clonal senescence and population**  
3 **fitness**

4  
5 **Ruijie Song<sup>1,2</sup> and Murat Acar<sup>1,2,3,4,\*</sup>**

6  
7 <sup>1</sup> Systems Biology Institute, Yale University  
8 850 West Campus Drive, West Haven, CT 06516

9  
10 <sup>2</sup> Interdepartmental Program in Computational Biology and Bioinformatics, Yale  
11 University  
12 300 George Street, Suite 501, New Haven, CT 06511

13  
14 <sup>3</sup> Department of Molecular Cellular and Developmental Biology, Yale University  
15 219 Prospect Street, New Haven, CT 06511

16  
17 <sup>4</sup> Department of Physics, Yale University  
18 217 Prospect Street, New Haven, CT 06511

19  
20 \* To whom correspondence should be addressed: [murat.acar@yale.edu](mailto:murat.acar@yale.edu)

21  
22 **E-mail addresses of the authors:**

23  
24 Ruijie Song: [r.song@yale.edu](mailto:r.song@yale.edu)

25 Murat Acar: [murat.acar@yale.edu](mailto:murat.acar@yale.edu)

26  
27 **Full postal address of the submitting author:**

28  
29 Murat Acar  
30 Systems Biology Institute, Yale University  
31 850 West Campus Drive, Room: ISTC-122  
32 West Haven, CT 06516  
33 U.S.A.

## 1 ABSTRACT

2 **Background:** Asymmetry during cellular division, both in the uneven  
3 partitioning of damaged cellular components and of cell volume, is a cell  
4 biological phenomenon experienced by many unicellular organisms.  
5 Previous work based on a deterministic model claimed that such asymmetry  
6 in the partitioning of cell volume and of aging-associated damage confers a  
7 fitness benefit in avoiding clonal senescence, primarily by diversifying the  
8 cellular population. However, clonal populations of unicellular organisms  
9 are already naturally diversified due to the inherent stochasticity of  
10 biological processes.

11 **Results:** Applying a model of aging cells that accounts for natural cell-to-cell  
12 variations across a broad range of parameter values, here we show that the  
13 parameters directly controlling the accumulation and repair of damage are  
14 the most important factors affecting fitness and clonal senescence, while  
15 the effects of both segregation of damaged components and division  
16 asymmetry are frequently minimal and generally context-dependent.

17 **Conclusions:** We conclude that damage segregation and division asymmetry,  
18 perhaps counterintuitively, are not necessarily beneficial from an  
19 evolutionary perspective.

20

21

## 22 BACKGROUND

23 Even though the somatic cells of multicellular organisms accumulate significant  
24 amounts of aging-related damage throughout the lifetime of the organism, their  
25 young progeny generally start with low levels of protein damage. A number of  
26 mechanisms have been proposed to explain this phenomenon, generally involving  
27 some special way of eliminating damage in germ cells, or elimination of damaged  
28 germ cells [1–5]. A major hallmark of aging in higher organisms is the depletion or  
29 dysfunction of stem cells, which accumulate various forms of molecular damage  
30 during the aging process [6–8]. For unicellular organisms such as the budding yeast  
31 *Saccharomyces cerevisiae* or the fission yeast *Schizosaccharomyces pombe* undergoing  
32 mitosis, there is no somatic/germ cell distinction. Yet both *S. cerevisiae* and *S. pombe*  
33 exhibit lineage-specific aging [9–14]. In the budding yeast, for instance, the mother  
34 cell is known to accumulate aging-related damage markers such as  
35 extrachromosomal rDNA circles (ERCs) as it ages and eventually enters replicative  
36 senescence and dies, while the daughter cells that bud off from the mothers are  
37 mostly protected from the accumulated ERCs and generally enjoy a full replicative  
38 lifespan even if born from old mother cells [15]. Similar segregation of damaged

1 proteins has been observed during the binary fission of *S. pombe*, where oxidatively  
2 damaged carbonylated proteins are concentrated in one of the two daughter cells – in  
3 this case, the one carrying the previous birth scar [16]. Lineage-specific aging has  
4 also been observed in the bacteria *Caulobacter crescentus* and *Escherichia coli* [10,17–  
5 20], leading some to analogize the lineage-specific aging behavior in unicellular  
6 organisms to the somatic/germ cell distinction in higher ones.

7 The observation of damage-partitioning behavior even in unicellular species  
8 naturally raises the question of whether there is any selective advantage resulting  
9 from it. Using a deterministic model based on ordinary differential equations (ODEs)  
10 with fixed parameter values, Erjavec and colleagues examined two forms of  
11 asymmetry during the cell-division process, which we will denote as *division*  
12 *asymmetry* and *damage segregation*, respectively. The former refers to the  
13 asymmetric partitioning of cell volume (as naturally seen in *S. cerevisiae*) between  
14 the two cells after division, while the latter refers to the asymmetric partition of  
15 damaged cellular components. They concluded that such behavior indeed confers a  
16 fitness advantage: under their model, both damage segregation and division  
17 asymmetry allowed the population to survive a higher level of protein damage  
18 without entering clonal senescence than it otherwise would have [16]. The  
19 researchers attributed this effect to the ability of these mechanisms to diversify  
20 individuals within a population; in the absence of these mechanisms, the population  
21 of cells in their simulations are entirely homogeneous [16].

22 The fact that real cells are not homogeneous at all raises questions about the  
23 reliability of these predictions made based on such a fully deterministic model. It is  
24 well known that the expression level of genes can fluctuate substantially, even among  
25 cells that are genetically identical or indeed in the same cell over time [21–27]. This  
26 kind of fluctuations, commonly known as noise, can come from a variety of sources:  
27 cell-to-cell variations in the abundance of transcription and translation machinery  
28 (such as RNA polymerase, general transcription factors, and ribosomes), for instance,  
29 or the stochastic nature of transcription events that take place in any single cell  
30 [21,28]. Indeed, it has been shown that stochastic noise can cause drastic differences  
31 between reality and what a deterministic model predicts [29].

32 Bringing a more realistic approach to the study of aging cells in terms of damage  
33 accumulation, segregation behavior, and their effects on clonal senescence and fitness,  
34 here we investigate whether, and under what circumstances, damage segregation  
35 and division asymmetry confer fitness advantages in freely dividing unicellular  
36 organism populations when noise is taken into account. We focus on two forms of  
37 fitness advantages: resistance against clonal senescence, and increased rates of

1 population growth. We find that damage mitigation and the rate of damage  
2 accumulation play major roles in determining the fitness of the cells.

3

## 4 MATERIALS and METHODS

5

### 6 Modeling of cell growth and division in aging cells

7 We consider a cell that grows exponentially in volume during the cell cycle [30] and  
8 accumulates damage as it grows (Fig. 1A). Cells are assumed to accumulate damage  
9 ( $D$ ) at a constant rate  $r_{dmg}$ , and reduce damage via two sources, actively by repair and  
10 passively by dilution due to cell division and volume growth:

$$11 \quad \frac{dD}{dt} = r_{dmg} - r_{repair}(D) - \frac{D}{V} \frac{dV}{dt}$$

12 Here,  $D$  is an abstract value representing the concentration of damaged cellular  
13 components and other harmful artifacts of aging. For simplicity, we assume that the  
14 forms of damage represented by  $D$  are freely diffusible, segregable, and repairable,  
15 and that there are no other sources of damage affecting cell growth. The rate of  
16 damage repair  $r_{repair}$  as a function of  $D$  is assumed to follow Michaelis-Menten  
17 kinetics with parameters  $v_{max}$  and  $k_m$ :

$$18 \quad r_{repair}(D) = \frac{v_{max}D}{k_m + D}$$

19 The cell volume ( $V$ ) grows exponentially at a rate that is slowed by accumulated  
20 damage:

$$21 \quad \frac{dV}{dt} = \frac{r_{growth}V}{1 + D^\alpha}$$

22 where  $r_{growth}$  is the maximum growth rate constant and  $\alpha$  is a nonlinearity coefficient.

23 In the initial population of cells, each cell starts at an initial volume  $V_i$ . A cell is  
24 assumed to divide when it reaches a generation-dependent critical volume  $V_{crit}$  (Fig.  
25 1B). This critical volume increases linearly with replicative age (Table S1), consistent  
26 with the observations on single budding yeast cells [27]. The parameters of volume  
27 growth during cell cycle were selected to roughly correspond with the microscopic  
28 growth dynamics measured in budding yeast cells (Table S1) [31], with an  
29 approximate expected damage-free doubling time of 100 minutes for symmetrically  
30 dividing cells. We separated global noise into two categories: noise in cell volume  
31 control ( $n_v$ ), and noise in damage and its repair ( $n_d$ ). In each case, global noise was  
32 simulated as a random perturbation applied to each corresponding parameter: the

1 initial parameter value of each individual cell was sampled from a normal  
2 distribution  $N(\mu = p, \sigma = np)$ , where  $p$  is the selected mean parameter value from  
3 Tables S1-S2 and  $n$  is the applicable noise level.

4 During cell division, we consider the original cell (“mother”) to retain its identity  
5 and produce a new daughter cell, for ease of reference. The accumulated damage is  
6 distributed between mother and daughter cells as follows. Let  $D$  be the damage level  
7 of the mother cell before division, then the damage level of the newly produced  
8 daughter cell is equal to  $(1 - s)D$ , where  $s$  in the range  $[0, 1]$  is the parameter  
9 quantifying the extent of damage segregation, and the damage level of the mother  
10 cell after division is  $\frac{D(R+s)}{R}$ , where  $R$  is the ratio of the volume between the mother and  
11 daughter components after division. In other words, the total amount of the damage  
12 (equal to the damage level times volume) is constant across the specific cell division  
13 event.

14 At each cell division, we assumed that each daughter cell partially inherits its  
15 mother’s parameter values for all parameters listed in Tables S1-S2. For each  
16 parameter  $p$ , the new value  $p_{new}$  follows the relationship  $p_{new} = c p_{mother} + (1 -$   
17  $c) p_{fresh}$ , where  $p_{fresh}$  is a parameter value freshly sampled from the normal  
18 distribution applicable to that parameter,  $p_{mother}$  is the parameter value for the  
19 mother cell, and  $c$  is a constant in the range  $[0, 1]$  characterizing the level of  
20 inheritance: when  $c = 0$ , the daughter gets a new parameter value from the same  
21 distribution used to generate the parameter values used for the initial population of  
22 cells, while when  $c = 1$ , the daughter perfectly inherits its mother’s parameter value.

23 Since the simulated cells, just like real ones grown without nutrient limitations,  
24 exhibit exponential growth and can easily overwhelm the computing capacity if left  
25 unchecked (Fig. 1D), we kept the population size low by means of periodic resampling  
26 as a mimicry of using a turbidostat [25]. Because cells slow to divide due to damage  
27 are expected to be rapidly overtaken by faster-dividing cells, we did not include a  
28 separate procedure for killing cells due to accumulated damage.

29 To keep the generality of the model intact, we determined the parameter values  
30 to use in our model by combinatorially selecting from a grid spanning a wide range  
31 (Table S2), with a total of 7.185 million sets of parameter values tested. The  
32 parameter bounds are hand-selected to cover the arguably biologically plausible  
33 range. The noise parameters were capped at 10% because each parameter is  
34 perturbed independently, and so the noise in each parameter is expected to combine  
35 to produce higher noise in the overall phenotype. We chose the range of  $r_{dmg}$  so that  
36 the maximum will virtually immediately block cell growth in the absence of repair,  
37 and then chose the range of the repair parameters to match the range of  $r_{dmg}$ . These

1 parameters are also sampled on a logarithmic scale so as to capture a wide variety of  
2 damage strengths.

3 For each parameter set, we recorded its population size trajectory over the  
4 course of the simulation. From these numbers we calculated the average doubling  
5 time of the population. If the calculated average doubling time was greater than 1500  
6 minutes, it was treated as 1500 minutes for the purpose of analysis. Each simulation  
7 was repeated three times and the average doubling time resulting from the three  
8 repeats was calculated. For parameter sets producing reasonable fitness levels (<400  
9 min doubling time), we do not observe significant changes in the computed doubling  
10 time if the initial 600 minutes of the trajectory is omitted. This is expected since these  
11 populations relax rapidly to the steady state and the initial conditions have very  
12 limited impact when averaged over the long course of the simulation.

13

## 14 **Simulations of the Stochastic Model**

15 The model as described above was implemented in C++ using custom-written code,  
16 utilizing the SUNDIALS library [39]. The complete set of model parameters are  
17 summarized in Tables S1-S2.

18 Simulations for each parameter set chosen according to the tables above were  
19 performed from an initial set of 2000 cells. Every 40 minutes, the number of cells in  
20 the population was recorded and the fold-change in population growth from the  
21 previous time point was calculated, then the population was randomly resampled  
22 down to 2000 cells.

23 For the illustration of exponential growth as shown in Figure 1E, the simulation  
24 was performed as described above, except that

- 25 - The population size was recorded every 20 minutes;
- 26 - Resampling was not performed until the population size reached 1000 times the  
27 initial sample size (i.e., 2 million cells);
- 28 - The population size for the resampling was 50 times the initial sample size  
29 (100,000 cells).

30

## 31 **Analysis of Simulation Results**

32 We quantified the effect of changing the value of a parameter  $P$  on fitness (resistance  
33 against clonal senescence or increased rate of population growth) as follows. For  
34 simplicity, we denote the nine parameters of the model  $P_1, \dots, P_9$ , which can take  
35  $N_1, \dots, N_9$  possible values, respectively (Table S2). Without loss of generality, let  $P_1$  be

1 the parameter  $P$  we want to examine. Then, we partition the 7.185 million  
2 combinations into  $G_1 = \prod_{i=2}^9 N_i$  groups of  $N_1$  combinations each, where the  
3 combinations in each group only differ in the value of  $P_1$  (and have the same values  
4 of  $P_2, \dots, P_9$ ). For each group, we then computed a minimum and a maximum doubling  
5 time, from which we determined whether changing the value of  $P_1$  for this particular  
6 set of parameter value combination could cause a significant change in fitness (for  
7 clonal senescence, a difference in outcome; for growth rate, defined as more than 5%  
8 difference between minimum and maximum doubling time). Repeating this for all  $G_1$   
9 groups, we found that, in  $M_1$  of them, changing the value of  $P_1$  resulted in a significant  
10 change in fitness. Then, the frequency at which a change in the value of  $P_1$  could  
11 significantly alter fitness was  $M_1/G_1$ . The total number of groups for all parameters  
12 combined is  $G = \sum G_i = 12.56$  million. For clonal senescence, we found changes in  $M =$   
13  $\sum M_i = 1.41$  million groups. For fitness, we found significant changes in  $M = \sum M_i =$   
14 2.38 million groups.

15

## 16 **Quantification of Relative Abundance**

17 Each panel in Figures 3-7 and Figures S1-S4 quantifies the relative abundance of  
18 each possible value of a parameter  $Q$  among the parameter combinations where  
19 changes in the value of a different parameter  $P$  has a significant effect (>5%) on  
20 fitness. We denote the possible values of  $Q$  as  $Q_1, \dots, Q_n$ , and also denote the number  
21 of combinations where  $Q = Q_i$  and changes in  $P$  can cause a change (>5%) in fitness  
22 as  $Z_i^P$ . We further partition  $Z_i^P$  into three groups (colored blue, green and red in the  
23 figure panels) based on the value of  $P$  at which maximum fitness is attained (i.e.,  
24  $Z_i^P = Z_i^P(\text{blue}) + Z_i^P(\text{green}) + Z_i^P(\text{red})$ ), blue if  $P$  is at its largest possible value, red if  
25  $P$  is at its smallest possible value, and green if  $P$  is at an intermediate value.

26 Since the possible values of  $Q$  are arbitrarily selected from a large grid, the  
27 values are not necessarily equally responsive to fitness changes. Thus, as a  
28 normalization measure, we normalized the value of  $Z_i^P$  (and the partitioned) by the  
29 total number of combinations where  $Q = Q_i$  and changes in the value of any other  
30 parameter can cause a change (>5%) in fitness. In other words, the normalized value  
31 is  $S_i^P = \frac{Z_i^P}{\sum_P Z_i^P}$ . Similarly, for each color  $C$  the normalized value is  $S_i^P(C) = \frac{Z_i^P(C)}{\sum_P Z_i^P}$ .

32 The value of  $S_i^P$  can vary significantly depending on the identity of the parameter  
33  $P$ . To make the abundance value more uniform across panels, we further multiplied  
34  $S_i^P$  and  $S_i^P(C)$  for each color by a scaling factor equal to  $\frac{100}{\sum_i S_i^P}$  to produce the normalized  
35 abundance of  $Q_i$  plotted in each panel. Thus, the normalized abundance points within  
36 in each panel add up to a constant value of 100.

1

## 2 RESULTS

3

### 4 **Dissecting the key parameters affecting the clonal senescence outcome**

5 In our model, a cell reaches *senescence* when its growth rate is slow enough as to  
6 virtually stop dividing. A clonal population of cells exhibits *clonal senescence* if every  
7 single cell in the population reach senescence. For the purposes of our analysis, we  
8 classified a cell population as clonally senescent if it exhibits an average doubling  
9 time greater than 1000 minutes over the course of the simulation, which is more than  
10 ten times the expected doubling time in damage-free conditions.

11 To determine the degree of importance of a model parameter for clonal senescence,  
12 we examined how likely it is for changes in the value of one parameter to alter the  
13 senescence outcome. More formally, for each parameter  $P$ , we partitioned the 7.185  
14 million parameter value combinations into disjoint groups such that the combinations  
15 in each group only differ in the value of  $P$ , and calculated the fraction of groups whose  
16 combinations diverge in the clonal senescence outcome. While the absolute value of  
17 this fraction is necessarily dependent on the values of the other parameters we picked  
18 in the study, the relative value is still indicative of whether the parameter is relevant  
19 generally, or only when the other parameters are in a relatively narrow region of the  
20 parameter space.

21 Changes in the damage rate  $r_{dmg}$  caused a different senescence outcome in 93%  
22 of parameter combinations, and changes in the repair rate  $v_{max}$  caused a different  
23 outcome in 60% of cases. These observations were intuitive and reaffirmed the  
24 validity of the model setup, as the strongest effect was exerted on the amount of  
25 accumulated damage, with the possible values of the parameters spanning a wide  
26 range. As expected, we find the most-fit combination to be when the damage rate is  
27 lowest and the repair rate is highest (Fig. 2A, as indicated by red and blue coloring of  
28 their respective bars).

29 Changes in damage-related noise ( $n_d$ ), the Michaelis constant ( $k_m$ ) for repair,  
30 and the nonlinearity of damage's effect on growth ( $\alpha$ ) are less likely to affect the clonal  
31 senescence outcome. In only 4.6% of the parameter combinations did a change in  $\alpha$   
32 affect the clonal senescence outcome; for  $k_m$ , the number is slightly higher at 6.1%,  
33 while for  $n_d$ , it is lower at 2.3%. These parameters also affect the amount of  
34 accumulated damage or its effect on the cell, but the effects are weaker and less direct.  
35 When changes in these parameters did affect the senescence outcome, the direction  
36 is essentially uniform: in almost all of the cases, clonal senescence is avoided by



1 having high noise, low  $k_m$ , or low  $\alpha$  (Fig. 2A, color). This again makes sense: a lower  
2  $k_m$  means a higher repair rate, while a lower  $\alpha$  means a higher growth rate (when  
3  $D > 1$ , which is necessary for clonal senescence to even come into play because if  $D <$   
4 1 then the volume growth rate can't fall below half of the maximum growth rate). In  
5 the borderline cases where noise matters, moreover, higher noise means a better  
6 chance to come across good parameter values that could sustain the population.

7 Damage segregation and division asymmetry only affected the clonal senescence  
8 outcome in a very small fraction of parameter combinations – 1.6% and 0.4%  
9 respectively (Fig. 2A). We did find that damage segregation is overwhelmingly  
10 beneficial in the few cases where it did matter: in 99% of the cases in which  
11 segregation made a difference on the senescence outcome, some damage segregation  
12 (represented as the blue and green portions of the bar) was needed to avoid clonal  
13 senescence (Fig. 2A). On the other hand, division asymmetry is more likely to be  
14 detrimental, if not overwhelmingly so: in 60% of the cases where asymmetry made a  
15 difference in the senescence outcome (represented by the red portion of the bar), lack  
16 of asymmetry is necessary to avoid clonal senescence, while in the remaining 40%  
17 some level of asymmetry is necessary.

18 We therefore conclude that damage segregation and division asymmetry are not  
19 the main effectors of the senescence outcome. Interestingly, neither mechanism is  
20 capable of altering the total amount of damage accumulated in the population, which  
21 appears to be the key determinant. Thus, changing the damage accumulation rate  
22 and the maximum repair rate are most likely to cause (or avoid) clonal senescence.

23

## 24 **Characterizing the effect of age-associated damage on population fitness**

25 Clonal senescence, which implies a complete loss of fitness, is a drastic outcome, and  
26 it is certainly conceivable that a parameter might affect population fitness  
27 incrementally without causing the entire population to become senescent. We  
28 therefore examined the ability of each model parameter to affect the growth rate (or  
29 fitness) of the population (Fig. 2B). For this analysis, we calculated the doubling time  
30 output of our model using the parameter sets determined as described in the previous  
31 section, and examined the cases where the change in the value of one parameter could  
32 lead to a significant change (>5%) in doubling time. For each parameter  $P$ , we again  
33 partitioned the 7.185 million parameter value combinations into disjoint groups such  
34 that the combinations in each group only differ in the value of  $P$ , and calculated the  
35 fraction of groups whose maximum and minimum doubling time are different by more  
36 than 5%.

1 *The parameters most likely to affect the senescence outcome are also most likely to have*  
2 *strong fitness effects*

3 As in the output of clonal senescence, we found that  $r_{dmg}$  and  $v_{max}$  were the two  
4 parameters most likely to cause a fitness differential (>5% in terms of doubling time).  
5 Changing the damage accumulation rate  $r_{dmg}$  is capable of significantly altering  
6 fitness in more than 99% of all parameter combinations used, while changes in the  
7 maximum repair rate  $v_{max}$  significantly altered fitness in 78% of the parameter  
8 combinations (Fig. 2B). Other damage-related parameters are also more likely to  
9 affect fitness: changes in  $k_m$  and  $\alpha$  are each capable of affecting fitness in about one-  
10 fifth (23% and 22%, respectively) of the parameter combinations tested, compared to  
11 3% for the volume-module noise, the parameter that turned out to be the least likely  
12 to cause fitness differences (Fig. 2B). For three of the four parameters, moreover, the  
13 effect of a parameter value change on fitness is monotonic (as indicated by the  
14 prevalence of one color in the figures): a higher  $v_{max}$  (Fig. S2) virtually always  
15 improved fitness, while a higher  $r_{dmg}$  (Fig. S4) or  $k_m$  (Fig. S3) decreased fitness. This  
16 is expected given the functional forms linking these parameters to the model.  $\alpha$ , on  
17 the other hand, turned out to be a parameter with a double-edged impact on fitness,  
18 though unsurprisingly (Fig. 2B, 7, blue and red color). Introducing ultrasensitivity  
19 means that some damage levels will have less impact on fitness while others will have  
20 more. Depending on the other parameter values, then, the impact of  $\alpha$  on fitness could  
21 and did go in both directions (Fig. 7).

22

23 *Effect of damage segregation on fitness*

24 Somewhat surprisingly, we found that changes in damage segregation affected  
25 fitness in only 7% of the parameter value combinations used, compared to 6% for  
26 division asymmetry, and 7% for inheritance level and damage-related noise (Fig. 2B).  
27 To gain additional insights into what other parameters may interact with damage  
28 segregation to produce a fitness effect, we next examined those cases in which damage  
29 segregation could cause a significant change in population fitness. We found that  
30 most of the cases where damage segregation produced a fitness effect were seen when  
31 the damage rate was low and the repair rate was even lower (Fig. 3E, 3G), meaning  
32 that dilution is the primary method of damage reduction instead of active damage  
33 repair, giving significantly more prominence to the ability to sequester damage in the  
34 mother compartment. Another interesting observation related to these cases of  
35 parameter values is that higher values of  $\alpha$  caused damage segregation to behave  
36 more like a double-edged sword: when  $\alpha = 4$ , there were as many cases when damage  
37 segregation reduced fitness as when it improved fitness (Fig. 3F; compare red vs blue).  
38 This can be explained by the fact that the ultrasensitivity of fitness to damage level

1 caused by the high nonlinearity diminishes the impact of damage segregation on  
2 fitness when the damage level is low but amplifies the effect when a threshold is  
3 crossed – in either direction. Once the damage rate becomes higher, however, damage  
4 segregation becomes more of a double-edged sword, causing fitness decreases about  
5 as often as it causes fitness increases. As a modular validation of the modeling  
6 approach we took in this study, consistent with previous reports [32], we also found  
7 that the highest damage rate ( $1 \text{ min}^{-1}$ ) means that segregation is more likely to be  
8 beneficial compared to lower damage rates ( $0.1$  or  $0.2 \text{ min}^{-1}$ ) (Fig. 3E).

9

### 10 *Effect of division asymmetry on fitness*

11 We next examined the effect of introducing division asymmetry on population  
12 doubling time or fitness. Introduction of division asymmetry caused significant  
13 changes ( $>5\%$ ) in doubling time in only 6% of the parameter value combinations used,  
14 making it the parameter the second least likely to alter the fitness outcome (Fig. 2B).  
15 Unlike damage segregation, the effects of division asymmetry on fitness are more  
16 likely to be double-edged: in 40% of the cases where a change in the division  
17 asymmetry parameter significantly altered fitness, the highest fitness was seen when  
18 there was no division asymmetry (Fig. 2B, red color). Like damage segregation, this  
19 behavior was mostly seen when the damage rate was low and the repair rate was  
20 even lower (Fig. 4E, 4G), corresponding to situations where dilution is the primary  
21 means of reducing damage levels. Moreover, such detrimental effects from division  
22 asymmetry were only seen when some damage segregation was present (Fig. 4C, red  
23 line). We interpret this result as follows. The smaller daughter cell usually takes  
24 longer to reach the volume threshold before it is ready to divide for the first time,  
25 which drags down the volume growth (and therefore dilution) rate at the population  
26 level. This effect is more pronounced when the damage segregation mechanism  
27 enriched the larger mother compartment with damage, slowing the growth of the  
28 mother compartment and dilution of damage. At higher rates of damage  
29 accumulation and repair, division asymmetry also becomes predominantly beneficial  
30 (Fig. 4E, 4G, blue line).

31

### 32 *Effect of noise on fitness*

33 Just as in the case for clonal senescence, we found that in most cases, higher  
34 noise levels had a beneficial effect on population fitness (Figs. 5 and 6, blue); this was  
35 particularly pronounced when the inheritance level was high (Figs. 5D, 6D). We  
36 interpret this as due to the high inheritance level permitting the propagation of “good”

1 sets of parameter values selected by chance (and is more likely to be chosen if the  
2 noise value is high).

3

#### 4 *Summary*

5 Overall, we found that model parameters directly affecting the accumulation of  
6 damage and its effect on the growth rate are the most likely to affect fitness. The  
7 introduction of damage segregation or division asymmetry, on the other hand, had a  
8 significant effect on population fitness in only a small fraction of the cases and in a  
9 context-dependent manner; however, when there was an effect, it was far more likely  
10 to be beneficial than detrimental. The fitness impact of asymmetric partitioning of  
11 cell volume was similarly context-dependent: when dilution was the predominant  
12 mechanism for damage removal, it was more likely to be detrimental, whereas if  
13 active damage repair was predominant, it was more likely to be beneficial.

14

## 15 **DISCUSSION**

16 In this study, we comprehensively examine the effects of age-associated damage  
17 accumulation and removal on the phenotypes of clonal senescence and population  
18 fitness. Contrary to the results from a previous study which were based on a fully  
19 deterministic model with fixed parameter values [16], we found that neither damage  
20 segregation nor division asymmetry played a major role in the avoidance of clonal  
21 senescence once the natural diversity of the population is taken into account.  
22 Introduction of damage segregation eliminated clonal senescence only in a small  
23 fraction of borderline cases, while division asymmetry had an effect on clonal  
24 senescence in an even smaller fraction of cases; however, when there was an effect, it  
25 was more likely to cause clonal senescence than to eliminate it. While we acknowledge  
26 that the exact fraction will depend on the set of values and range chosen for the  
27 parameters, we believe that the relative value is still a good and useful indicator of  
28 the approximate importance and effect size of the parameters.

29 We note that our model differs from the model used in the previously published work  
30 in more ways than just the use of randomized coefficients. For instance, our model  
31 keeps track of single-cell volume explicitly, while the previous model used the protein  
32 count as a proxy for volume. Using protein count for cell volume inevitably led to some  
33 questionable assumptions where the partitioning of damaged proteins necessitated  
34 the inverse partitioning of undamaged proteins to maintain the protein count (and so  
35 the volume) of the daughter cell. Similarly, the sole mechanism for damaged protein  
36 to exert a detrimental effect in the previous model was by negative feedback on the

1 production of new proteins, which required the amount of damaged proteins to be  
2 roughly comparable to that of intact proteins to have a meaningful effect, requiring  
3 likely unrealistic amounts of damage. Our model avoids these problems by using a  
4 more abstract “damage level” concept.

5 Uneven distribution of aging factors between daughter cells following cell  
6 division is a well-known phenomenon that has been observed in a variety of  
7 unicellular organisms, and asymmetric partitioning of volume has similarly also been  
8 observed in many unicellular organisms. In the present work, we comprehensively  
9 examine the fitness impact of these asymmetric damage and volume partitioning  
10 schemes and find that they, perhaps counterintuitively, have minimal fitness impact  
11 most of the time, as long as the natural diversity of the population is taken into  
12 account. When the repair rate was low and dilution was the predominant form of  
13 damage elimination, we found damage segregation to be more likely to be beneficial  
14 for fitness but division asymmetry to be generally detrimental. On the other hand,  
15 when active damage repair was the predominant damage elimination mechanism  
16 operating with a high damage repair rate, division asymmetry was found to be  
17 generally beneficial for fitness, while damage segregation had a double-edged impact,  
18 becoming more beneficial when the damage accumulation rate was very high.

19 Overall, our results here indicate that parameters governing the accumulation  
20 and elimination of cellular damage are the most important determinants of  
21 population fitness. Even though asymmetric partitioning of either cell volume or age-  
22 associated damage might seem beneficial at first glance, neither mechanism actually  
23 eliminates any damage on the population level, and, as we show here, they are far  
24 from being consistently beneficial evolutionarily. Why, then, are these mechanisms  
25 seen in some real organisms? To start with, the fitness impact of both mechanisms is  
26 context-dependent; depending on the values of other parameters, representing  
27 conditions both intrinsic and extrinsic to the cell, introduction of damage segregation  
28 and/or division asymmetry may be either beneficial or detrimental. Thus, it is  
29 possible that the organisms exhibiting damage segregation and/or division  
30 asymmetry fall within the section of the parameter space where such mechanisms  
31 are beneficial rather than detrimental, at least for some portion of their lifespan. And  
32 even if this region of the parameter space is not a common occurrence, the importance  
33 of avoiding irreversible senescence when it is encountered may be sufficient to  
34 preserve the mechanism evolutionarily, similar to how obscure nutrient pathways  
35 are preserved due to their critical importance under certain growth conditions.  
36 Second, in many cases, introduction of these mechanisms resulted in minimal fitness  
37 impact, but even minimal levels of fitness impact can accumulate over time and drive  
38 evolutionary selection. Moreover, several natural forms of damage are resistant to

1 active repair, and thus may fall within the region of the parameter space where  
2 damage segregation is beneficial. For instance, carbonylated proteins can form  
3 aggregates that are resistant to proteasome digestion [33,34], and ERCs are self-  
4 replicating, suggesting that their effective repair rate – accounting for such self-  
5 replication – is probably also low [15,35]. Finally, for asymmetric partitioning of  
6 damage in particular, it has been reported that some organisms like *S. pombe* and *E.*  
7 *coli* only exhibit this behavior during high levels of external stress [14,18,32,36],  
8 suggesting that they may actually have evolved mechanisms to activate or inactivate  
9 damage partitioning depending on the region of parameter space they are in, just like  
10 other stress response mechanisms that are only activated in the presence of stress  
11 and can be epigenetically inherited by daughter cells [37,38].

12

13

14

15

## 1 REFERENCES

- 2 1. Kirkwood TB. Evolution of ageing. *Nature*. 1977;270: 301–4.  
3 doi:10.1038/270301a0
- 4 2. Kirkwood TBL, Holliday R. The evolution of ageing and longevity. *Proc R Soc*  
5 *L B Biol Sci*. 1979;205: 531.
- 6 3. Hernebring M, Brolén G, Aguilaniu H, Semb H, Nyström T. Elimination of  
7 damaged proteins during differentiation of embryonic stem cells. *Proc Natl*  
8 *Acad Sci U S A*. 2006;103: 7700–5. doi:10.1073/pnas.0510944103
- 9 4. Song R, Sarnoski EA, Acar M. *The Systems Biology of Single-Cell Aging*.  
10 *iScience*. Elsevier; 2018;7: 154–169. doi:10.1016/j.isci.2018.08.023
- 11 5. Holliday R. Growth and death of diploid and transformed human fibroblasts.  
12 *Biology of Aging and Development*. Boston, MA: Springer US; 1975. pp. 97–  
13 106. doi:10.1007/978-1-4684-2631-1\_11
- 14 6. Espada L, Ermolaeva MA. DNA Damage as a Critical Factor of Stem Cell  
15 Aging and Organ Homeostasis. *Curr Stem Cell Reports*. Springer  
16 International Publishing; 2016;2: 290–298. doi:10.1007/s40778-016-0052-6
- 17 7. Moskalev AA, Shaposhnikov M V., Plyusnina EN, Zhavoronkov A, Budovsky  
18 A, Yanai H, et al. The role of DNA damage and repair in aging through the  
19 prism of Koch-like criteria. *Ageing Research Reviews*. 2013. pp. 661–684.  
20 doi:10.1016/j.arr.2012.02.001
- 21 8. Siudeja K, Nassari S, Gervais L, Skorski P, Lameiras S, Stolfa D, et al.  
22 Frequent Somatic Mutation in Adult Intestinal Stem Cells Drives Neoplasia  
23 and Genetic Mosaicism during Aging. *Cell Stem Cell*. Elsevier; 2015;17: 663–  
24 674. doi:10.1016/j.stem.2015.09.016
- 25 9. Erjavec N, Cvijovic M, Klipp E, Nyström T. Selective benefits of damage  
26 partitioning in unicellular systems and its effects on aging. *Proc Natl Acad Sci*  
27 *U S A*. National Academy of Sciences; 2008;105: 18764–9.  
28 doi:10.1073/pnas.0804550105
- 29 10. Florea M. Aging and immortality in unicellular species. *Mech Ageing Dev*.  
30 Elsevier; 2017;167: 5–15. doi:10.1016/J.MAD.2017.08.006
- 31 11. Liu P, Acar M. The generational scalability of single-cell replicative aging. *Sci*  
32 *Adv*. 2018;4. doi:10.1126/sciadv.aao4666
- 33 12. Liu P, Young TZ, Acar M. Yeast Replicator: A High-Throughput Multiplexed  
34 Microfluidics Platform for Automated Measurements of Single-Cell Aging.  
35 *Cell Rep*. 2015; doi:10.1016/j.celrep.2015.09.012
- 36 13. Barker MG, Walmsley RM. Replicative ageing in the fission yeast  
37 *Schizosaccharomyces pombe*. *Yeast*. 1999;15: 1511–1518.

- 1           doi:10.1002/(SICI)1097-0061(199910)15:14<1511::AID-YEA482>3.0.CO;2-Y
- 2   14.   Coelho M, Dereli A, Haese A, Kühn S, Malinovska L, DeSantis ME, et al.  
3       Fission Yeast Does Not Age under Favorable Conditions, but Does So after  
4       Stress. *Curr Biol*. 2013;23: 1844–1852. doi:10.1016/j.cub.2013.07.084
- 5   15.   Sinclair DA, Guarente L. Extrachromosomal rDNA circles--a cause of aging in  
6       yeast. *Cell*. 1997;91: 1033–42. doi:10.1016/s0092-8674(00)80493-6
- 7   16.   Erjavec N, Cvijovic M, Klipp E, Nyström T. Selective benefits of damage  
8       partitioning in unicellular systems and its effects on aging. *Proc Natl Acad Sci*  
9       U S A. National Academy of Sciences; 2008;105: 18764–9.  
10      doi:10.1073/pnas.0804550105
- 11 17.   Stewart EJ, Madden R, Paul G, Taddei F. Aging and Death in an Organism  
12       That Reproduces by Morphologically Symmetric Division. Kirkwood T, editor.  
13       *PLoS Biol*. 2005;3: e45. doi:10.1371/journal.pbio.0030045
- 14 18.   Rang CU, Peng AY, Chao L. Temporal Dynamics of Bacterial Aging and  
15       Rejuvenation. *Current Biology*. 2011. doi:10.1016/j.cub.2011.09.018
- 16 19.   Ackermann M. Senescence in a Bacterium with Asymmetric Division. *Science*.  
17       2003;300: 1920–1920. doi:10.1126/science.1083532
- 18 20.   Ackermann M, Schauerte A, Stearns SC, Jenal U. Experimental evolution of  
19       aging in a bacterium. *BMC Evol Biol*. BioMed Central; 2007;7: 126.  
20       doi:10.1186/1471-2148-7-126
- 21 21.   Elowitz MB, Levine AJ, Siggia ED, Swain PS. Stochastic Gene Expression in  
22       a Single Cell. *Science*. 2002;297: 1183–1186. doi:10.1126/science.1070919
- 23 22.   Raser JM, O’Shea EK. Control of Stochasticity in Eukaryotic Gene  
24       Expression. *Science*. 2004;304: 1811–1814. doi:10.1126/science.1098641
- 25 23.   Raser JM, O’Shea EK. Noise in Gene Expression: Origins, Consequences, and  
26       Control. *Science*. 2005;309: 2010–2013. doi:10.1126/science.1105891
- 27 24.   Liu P, Song R, Elison GL, Peng W, Acar M. Noise reduction as an emergent  
28       property of single-cell aging. *Nat Commun*. Nature Publishing Group; 2017;8:  
29       680. doi:10.1038/s41467-017-00752-9
- 30 25.   Acar M, Mettetal JT, van Oudenaarden A. Stochastic switching as a survival  
31       strategy in fluctuating environments. *Nat Genet*. Nature Publishing Group;  
32       2008;40: 471–475. doi:10.1038/ng.110
- 33 26.   Acar M, Becskei A, van Oudenaarden A. Enhancement of cellular memory by  
34       reducing stochastic transitions. *Nature*. Macmillian Magazines Ltd.;  
35       2005;435: 228–232. doi:10.1038/nature03524
- 36 27.   Sarnoski EA, Song R, Ertekin E, Koonce N, Acar M. Fundamental  
37       Characteristics of Single-Cell Aging in Diploid Yeast. *iScience*. Elsevier;



- 1           2018;7: 96–109. doi:10.1016/j.isci.2018.08.011
- 2   28.   Swain PS, Elowitz MB, Siggia ED. Intrinsic and extrinsic contributions to  
3       stochasticity in gene expression. *Proc Natl Acad Sci.* 2002;99: 12795–12800.  
4       doi:10.1073/pnas.162041399
- 5   29.   To T-L, Maheshri N. Noise Can Induce Bimodality in Positive Transcriptional  
6       Feedback Loops Without Bistability. *Science.* 2010;327: 1142–1145.  
7       doi:10.1126/science.1178962
- 8   30.   Talia S Di, Skotheim JM, Bean JM, Siggia ED, Cross FR. The effects of  
9       molecular noise and size control on variability in the budding yeast cell cycle.  
10      *Nature.* Nature Publishing Group; 2007;448: 947–951.  
11      doi:10.1038/nature06072
- 12 31.   Ferrezuelo F, Colomina N, Palmisano A, Garí E, Gallego C, Csikász-Nagy A,  
13      et al. The critical size is set at a single-cell level by growth rate to attain  
14      homeostasis and adaptation. *Nat Commun.* Nature Publishing Group; 2012;3:  
15      1012. doi:10.1038/ncomms2015
- 16 32.   Vedel S, Nunns H, Košmrlj A, Semsey S, Trusina A. Asymmetric Damage  
17      Segregation Constitutes an Emergent Population-Level Stress Response. *Cell*  
18      *Syst.* 2016;3: 187–198. doi:10.1016/j.cels.2016.06.008
- 19 33.   Nyström T. Role of oxidative carbonylation in protein quality control and  
20      senescence. *EMBO J.* European Molecular Biology Organization; 2005;24:  
21      1311–7. doi:10.1038/sj.emboj.7600599
- 22 34.   Andersson V, Hanzén S, Liu B, Molin M, Nyström T. Enhancing protein  
23      disaggregation restores proteasome activity in aged cells. *Aging (Albany NY).*  
24      2013;5: 802–812. doi:10.18632/aging.100613
- 25 35.   Kaeberlein M, McVey M, Guarente L. The SIR2/3/4 complex and SIR2 alone  
26      promote longevity in *Saccharomyces cerevisiae* by two different mechanisms.  
27      *Genes Dev.* 1999;13: 2570–2580. doi:10.1101/gad.13.19.2570
- 28 36.   Wang P, Robert L, Pelletier J, Dang WL, Taddei F, Wright A, et al. Robust  
29      Growth of *Escherichia coli*. *Curr Biol.* Cell Press; 2010;20: 1099–1103.  
30      doi:10.1016/J.CUB.2010.04.045
- 31 37.   Chatterjee M, Acar M. Heritable stress response dynamics revealed by single-  
32      cell genealogy. *Sci Adv.* American Association for the Advancement of Science;  
33      2018;4: e1701775. doi:10.1126/sciadv.1701775
- 34 38.   Xue Y, Acar M. Mechanisms for the epigenetic inheritance of stress response  
35      in single cells. *Curr Genet.* Springer Berlin Heidelberg; 2018; 1–8.  
36      doi:10.1007/s00294-018-0849-1
- 37 39.   Hindmarsh AC, Brown PN, Grant KE, Lee SL, Serban R, Shumaker DE, et al.  
38      SUNDIALS: Suite of nonlinear and differential/algebraic equation solvers.

1 ACM Trans Math Softw. ACM; 2005;31: 363–396.

2

3

4 **DECLARATIONS:**

5

6 **ACKNOWLEDGEMENTS**

7 We thank G. Elison and G. Urbonaite for comments and feedback on the manuscript,  
8 and K. Miller-Jensen, C. O’Hern, and Acar Lab members for their comments on the  
9 project in its various stages. The authors also acknowledge the use of the Open  
10 Science Grid resources.

11

12 **FUNDING**

13 MA acknowledges funding from the National Institutes of Health (1DP2AG050461-  
14 01 and 1R01GM127870-01). This work was supported in part by the facilities and  
15 staff of the Yale University Faculty of Arts and Sciences High Performance  
16 Computing Center, and by the National Science Foundation under grant #CNS 08-  
17 21132 that partially funded acquisition of the facilities.

18

19 **AUTHOR CONTRIBUTIONS**

20 RS and MA designed the project, including designing the model, simulations and  
21 their analyses. RS implemented the model in C++ and performed the simulations and  
22 analyses. RS and MA interpreted the results, and prepared, read, and approved the  
23 manuscript.

24

25 **COMPETING INTERESTS**

26 The authors declare that they have no competing interests.

27

28 **DATA and MATERIAL AVAILABILITY**

29 The data and materials related to this work are available upon request.

30

31 **ETHICS APPROVAL and CONSENT to PARTICIPATE**

32 Not applicable.

1

## 2 **CONSENT to PUBLISH**

3 Not applicable.

4

## 5 **FIGURE LEGENDS**

6

7 **Fig. 1. A.** Illustration of the model. The cell grows until it reaches a critical volume  
8 and divides. It accumulates damage over time, which slows down volume growth. The  
9 accumulated damage can also be repaired. There is no separate mechanism for killing  
10 a cell due to damage, because high level of accumulated damage will prevent a cell  
11 from dividing and cause it to be rapidly overtaken by faster-dividing cells. **B.** The cell  
12 volume module of the model. The volume grows exponentially until it reaches a  
13 generation-dependent critical volume and the cell divides (blue dashed line). **C.** Two  
14 mechanisms of particular interest in this study: segregation of damaged proteins in  
15 mother cells, and division asymmetry of cell volume. Yellow dots indicate normal  
16 proteins, while green dots indicate damaged proteins. **D.** Illustration of the  
17 exponential growth of simulated cell population. An initial population of 2000 cells  
18 were simulated for 6000 minutes with periodic resampling (blue dashes) every time  
19 the population size exceeds 2 million cells. The red dashed line indicates the expected  
20 population size without sampling.

21

22 **Fig. 2. A.** Sensitivity analysis for the clonal senescence outcome. The parameter  
23 combinations tested were partitioned into groups such that all combinations in each  
24 group differs only in the value of one parameter. The fraction of groups with divergent  
25 senescence outcome is plotted for each parameter. **B.** Sensitivity analysis for the  
26 doubling time outcome. The parameter combinations tested were partitioned into  
27 groups such that all combinations in each group differs only in the value of one  
28 parameter. The fraction of groups where the minimum doubling time is at least 5%  
29 below the maximum is plotted for each parameter. Level of transparency indicates  
30 the size of the effect. In each panel, the color indicates the value of the parameter  
31 corresponding to the most-fit combination in the group: red indicates that the  
32 smallest parameter value is the most fit; blue indicates that the largest parameter  
33 value is the most fit; and green indicates that an intermediate parameter value is the  
34 most fit.

35

36 **Fig. 3. A-H.** Relative representation of the other parameters in the cases where  
37 changing the level of damage segregation caused a significant (>5%) fitness difference.

1 In each panel, the color indicates the level of damage segregation resulting in  
2 maximum fitness: red indicates that no segregation is the most fit; blue indicates that  
3 full segregation is the most fit; and green indicates that an intermediate level of  
4 segregation is the most fit.

5

6 **Fig. 4. A-H.** Relative representation of the other parameters in the cases where  
7 changing the level of division asymmetry caused a significant (>5%) fitness difference.  
8 In each panel, the color indicates the level of division asymmetry resulting in  
9 maximum fitness: red indicates that no division asymmetry is the most fit; blue  
10 indicates that maximum asymmetry (1:4) is the most fit; and green indicates that an  
11 intermediate level of asymmetry is the most fit.

12

13 **Fig. 5. A-H.** Relative representation of the other parameters in the cases where  
14 changing the level of damage-related noise caused a significant (>5%) fitness  
15 difference. In each panel, the color indicates the level of damage-related noise  
16 resulting in maximum fitness: red indicates that no damage-related noise is the most  
17 fit; blue indicates that maximum damage-related noise (10%) is the most fit; and  
18 green indicates that an intermediate level of damage-related noise (5%) is the most  
19 fit.

20

21 **Fig. 6. A-H.** Relative representation of the other parameters in the cases where  
22 changing the level of volume module noise caused a significant (>5%) fitness  
23 difference. In each panel, the color indicates the level of volume module noise  
24 resulting in maximum fitness: red indicates that no volume module noise is the most  
25 fit; blue indicates that maximum volume module noise (10%) is the most fit; and green  
26 indicates that an intermediate level of volume module noise (5%) is the most fit.

27

28 **Fig. 7. A-H.** Relative representation of the other parameters in the cases where  
29 changing the nonlinearity of the effect of damage on volume growth rate caused a  
30 significant (>5%) fitness difference. In each panel, the color indicates the level of  
31 nonlinearity resulting in maximum fitness: red indicates that no nonlinearity ( $\alpha = 1$ )  
32 is the most fit; blue indicates that maximum nonlinearity ( $\alpha = 4$ ) is the most fit; and  
33 green indicates that an intermediate level of nonlinearity is the most fit.

34

**A**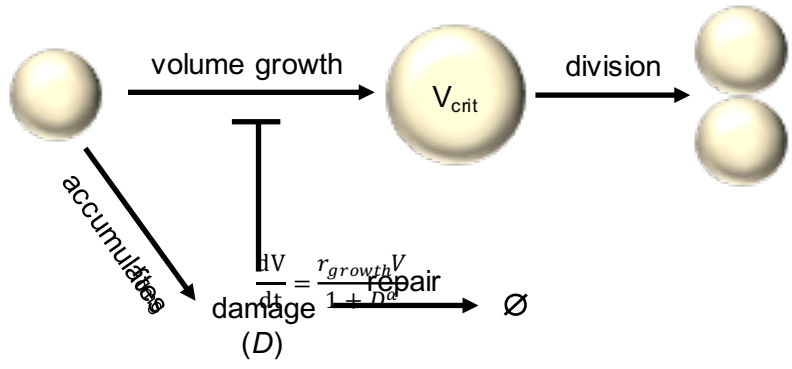**B**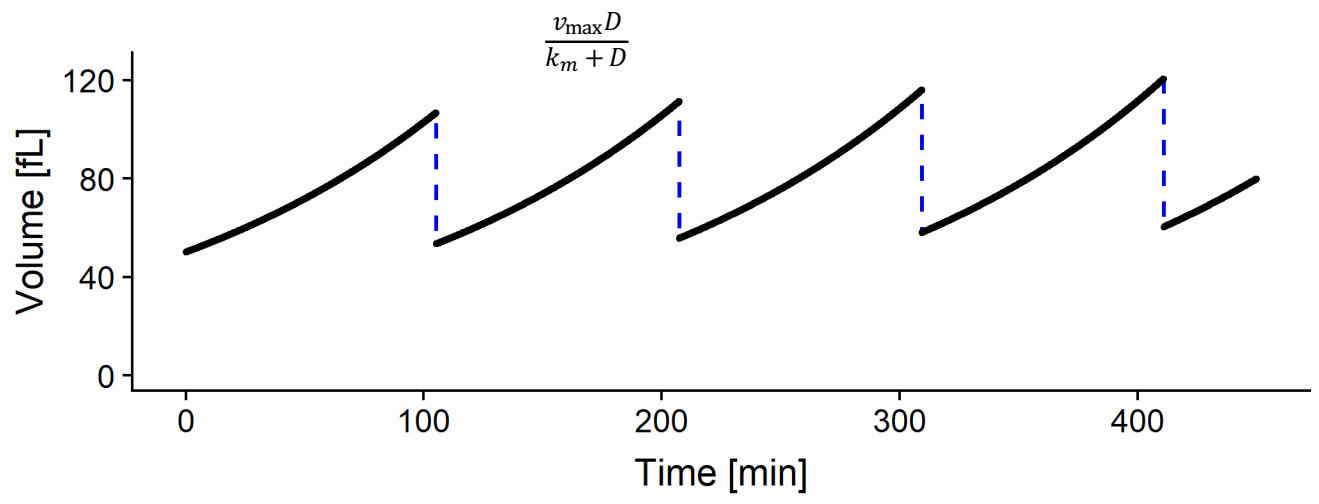**C**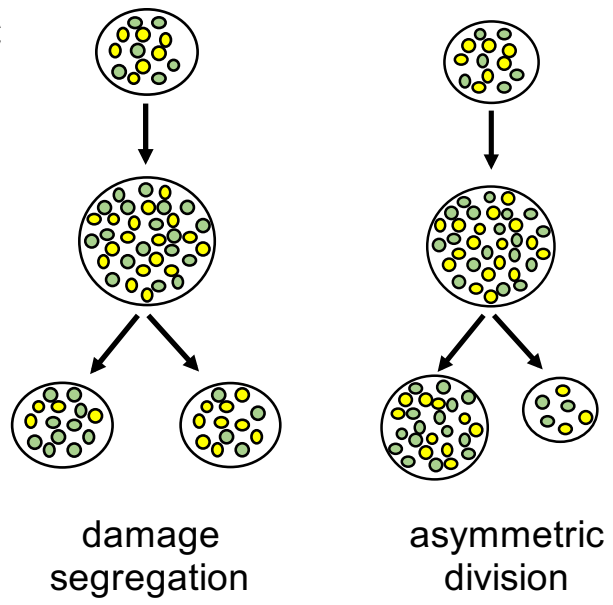**D**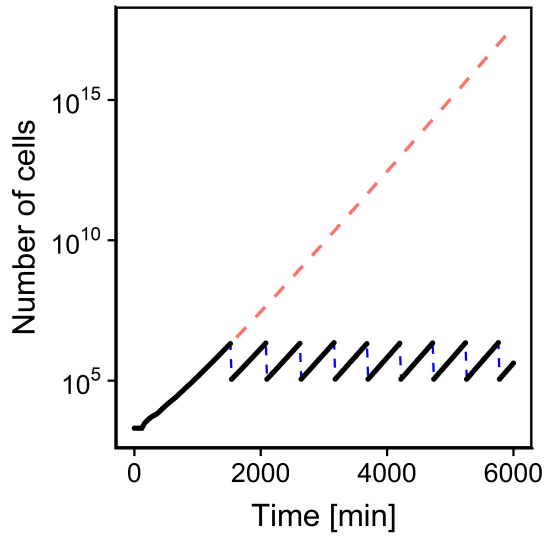**Figure 1**

**A**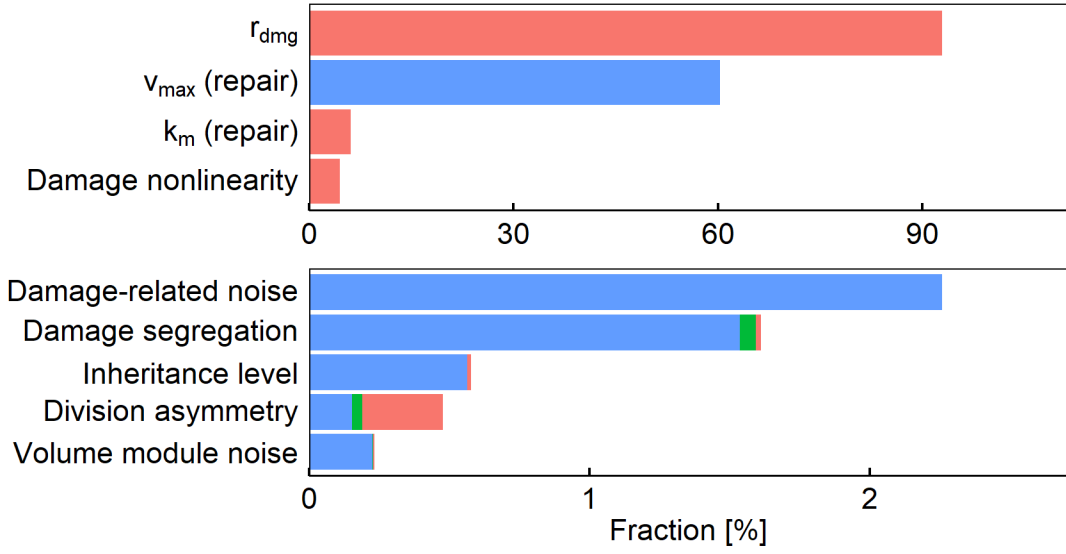**B**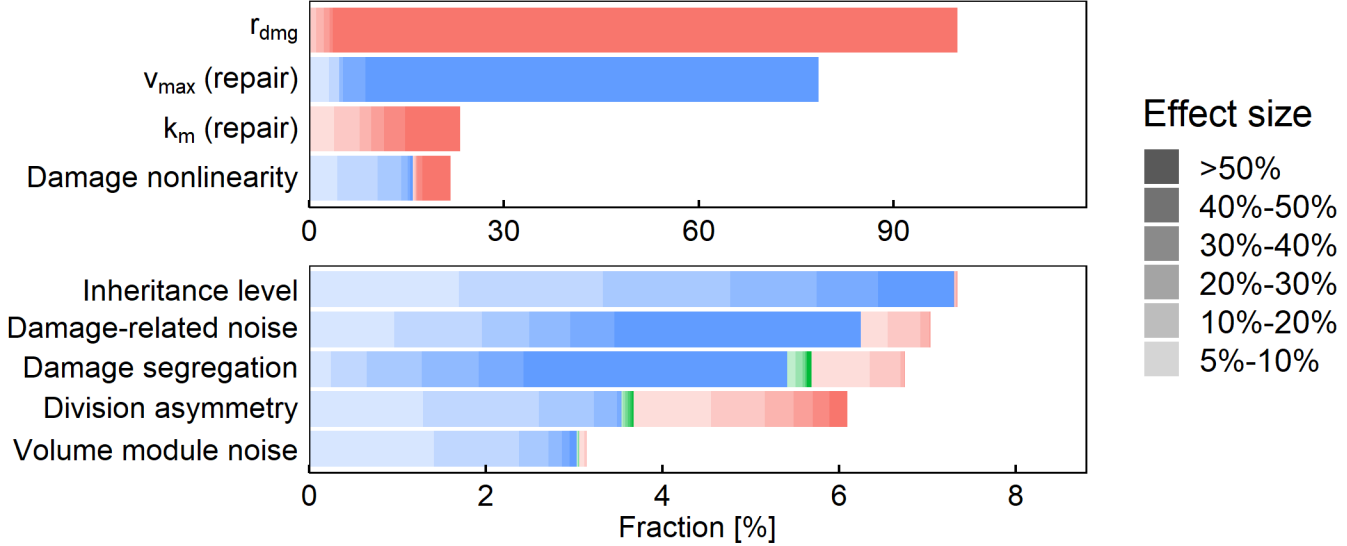**Figure 2**

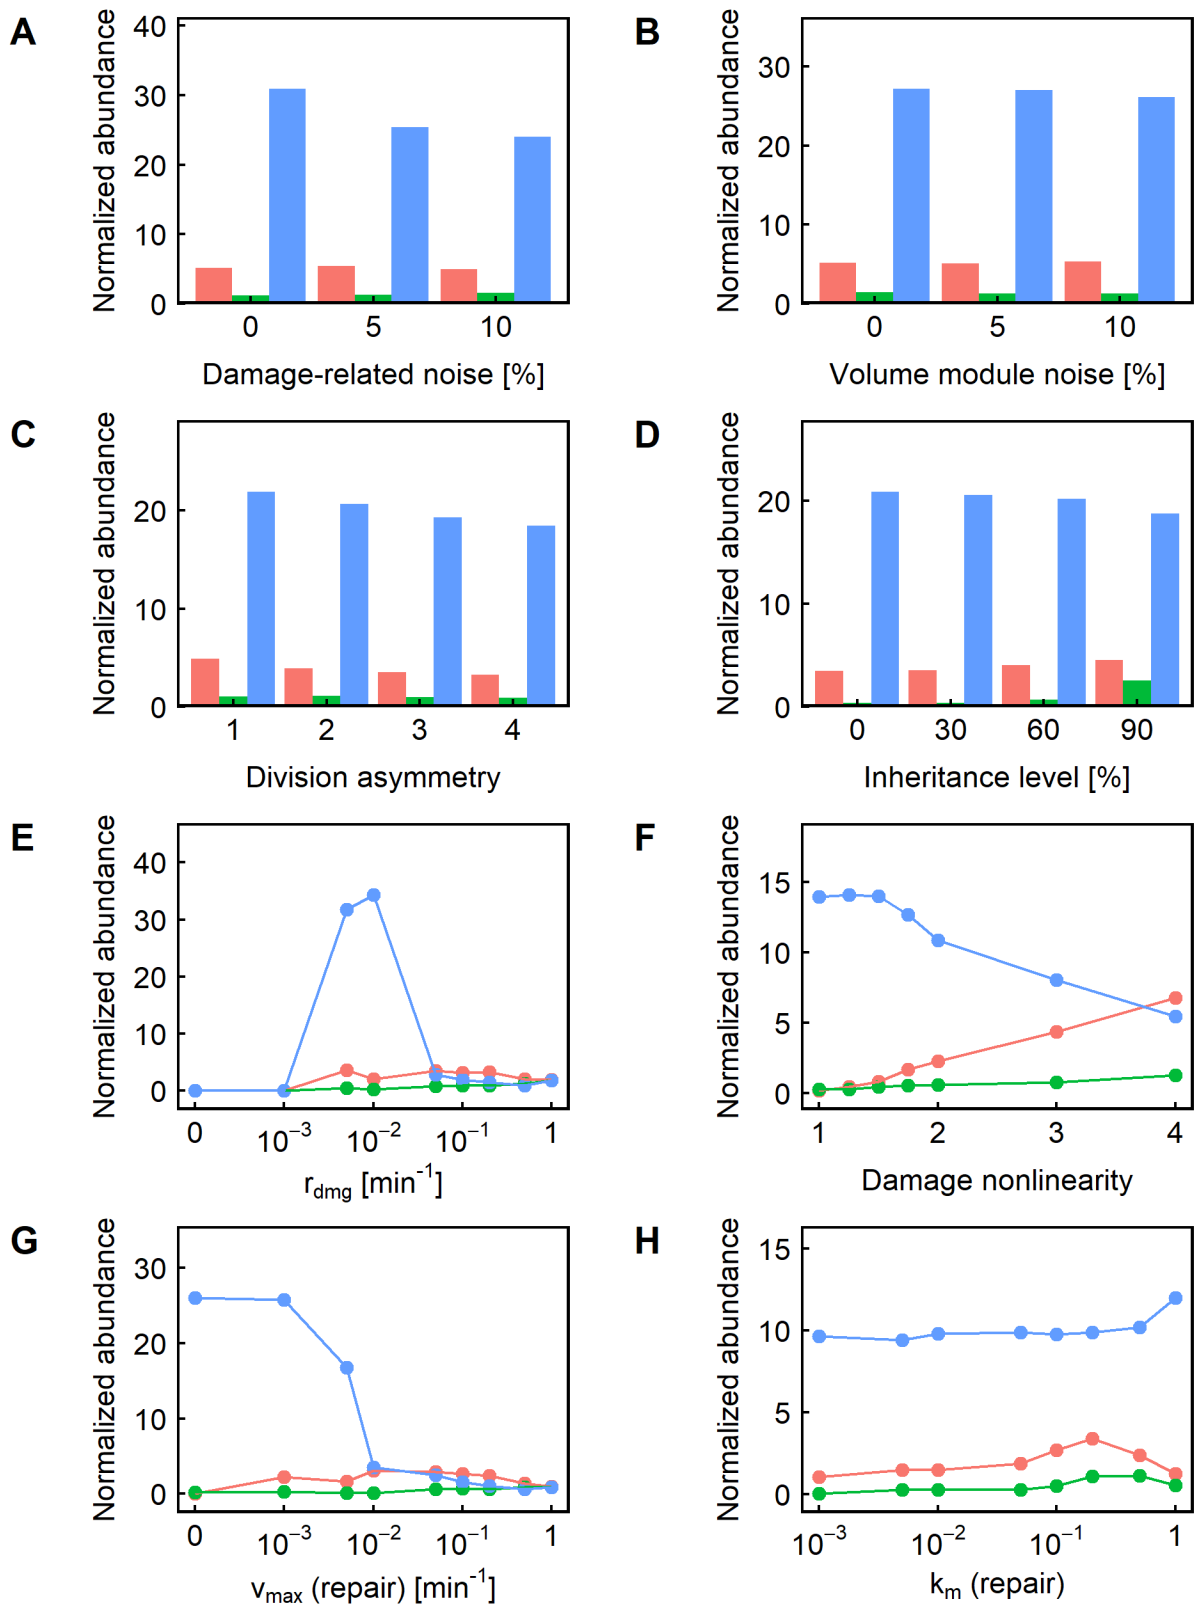

**Figure 3**

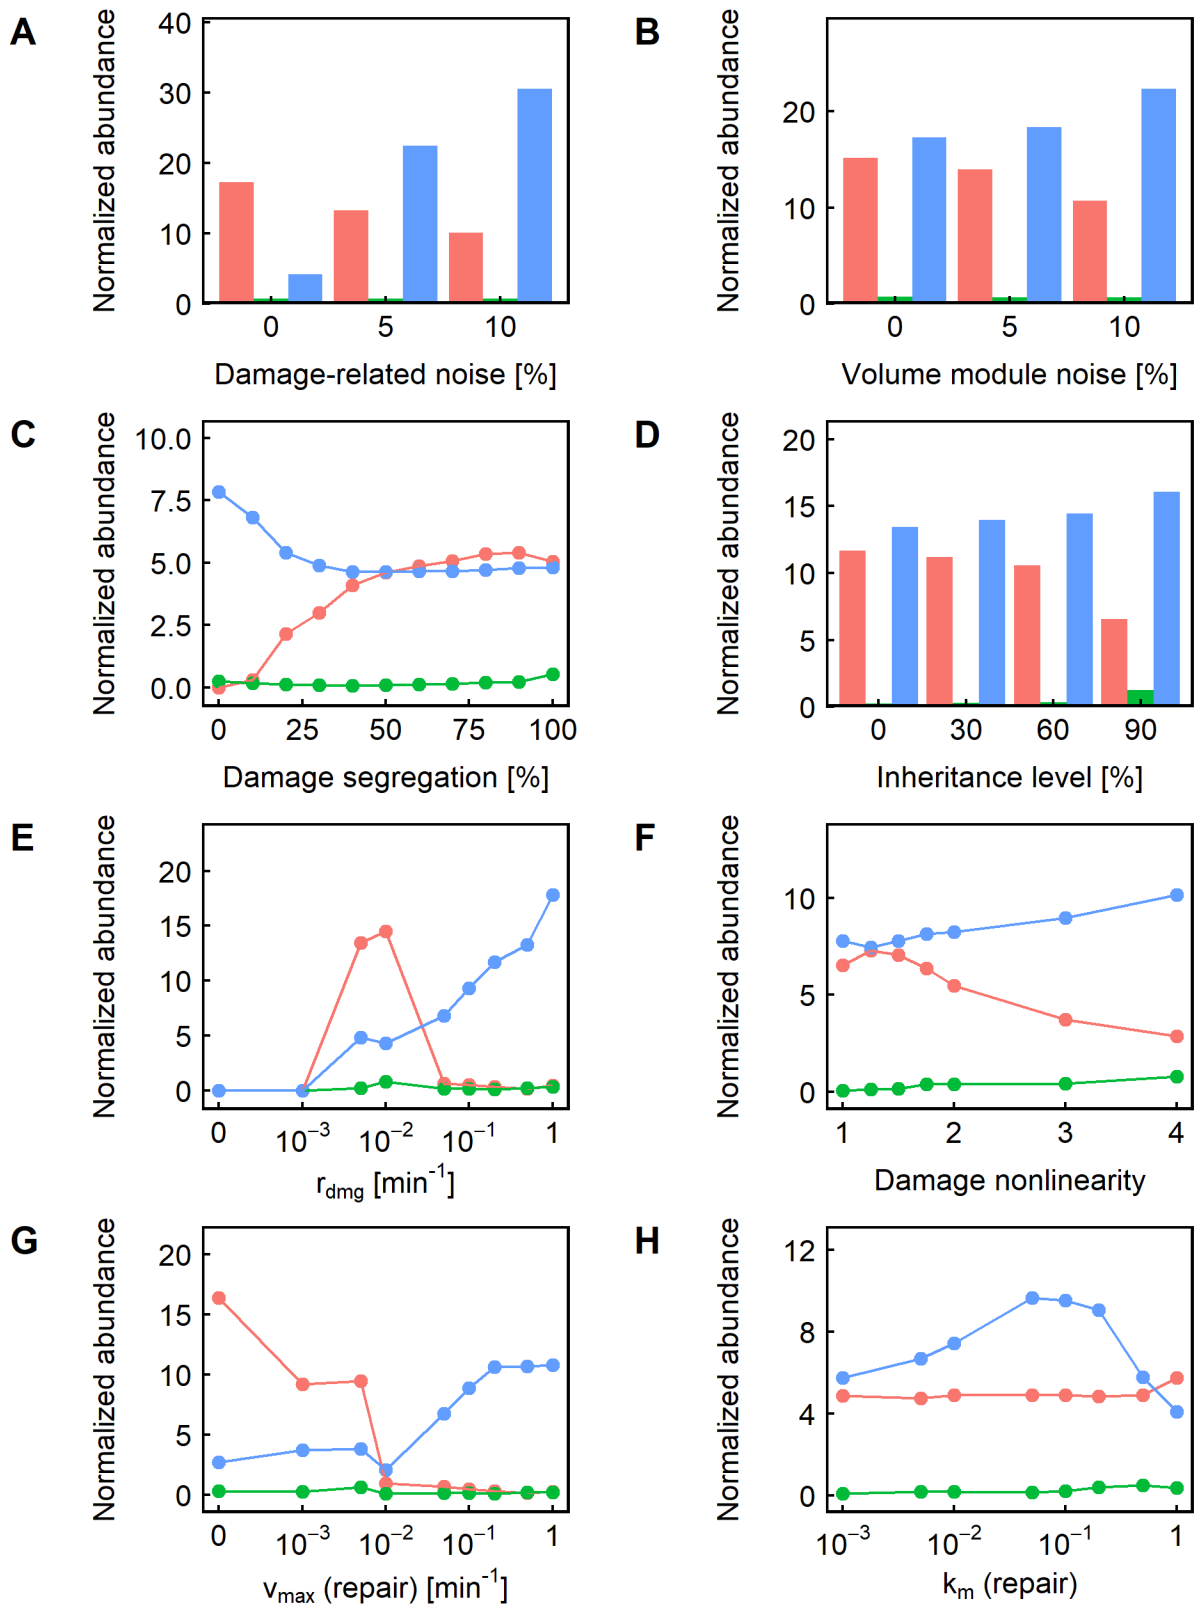

Figure 4



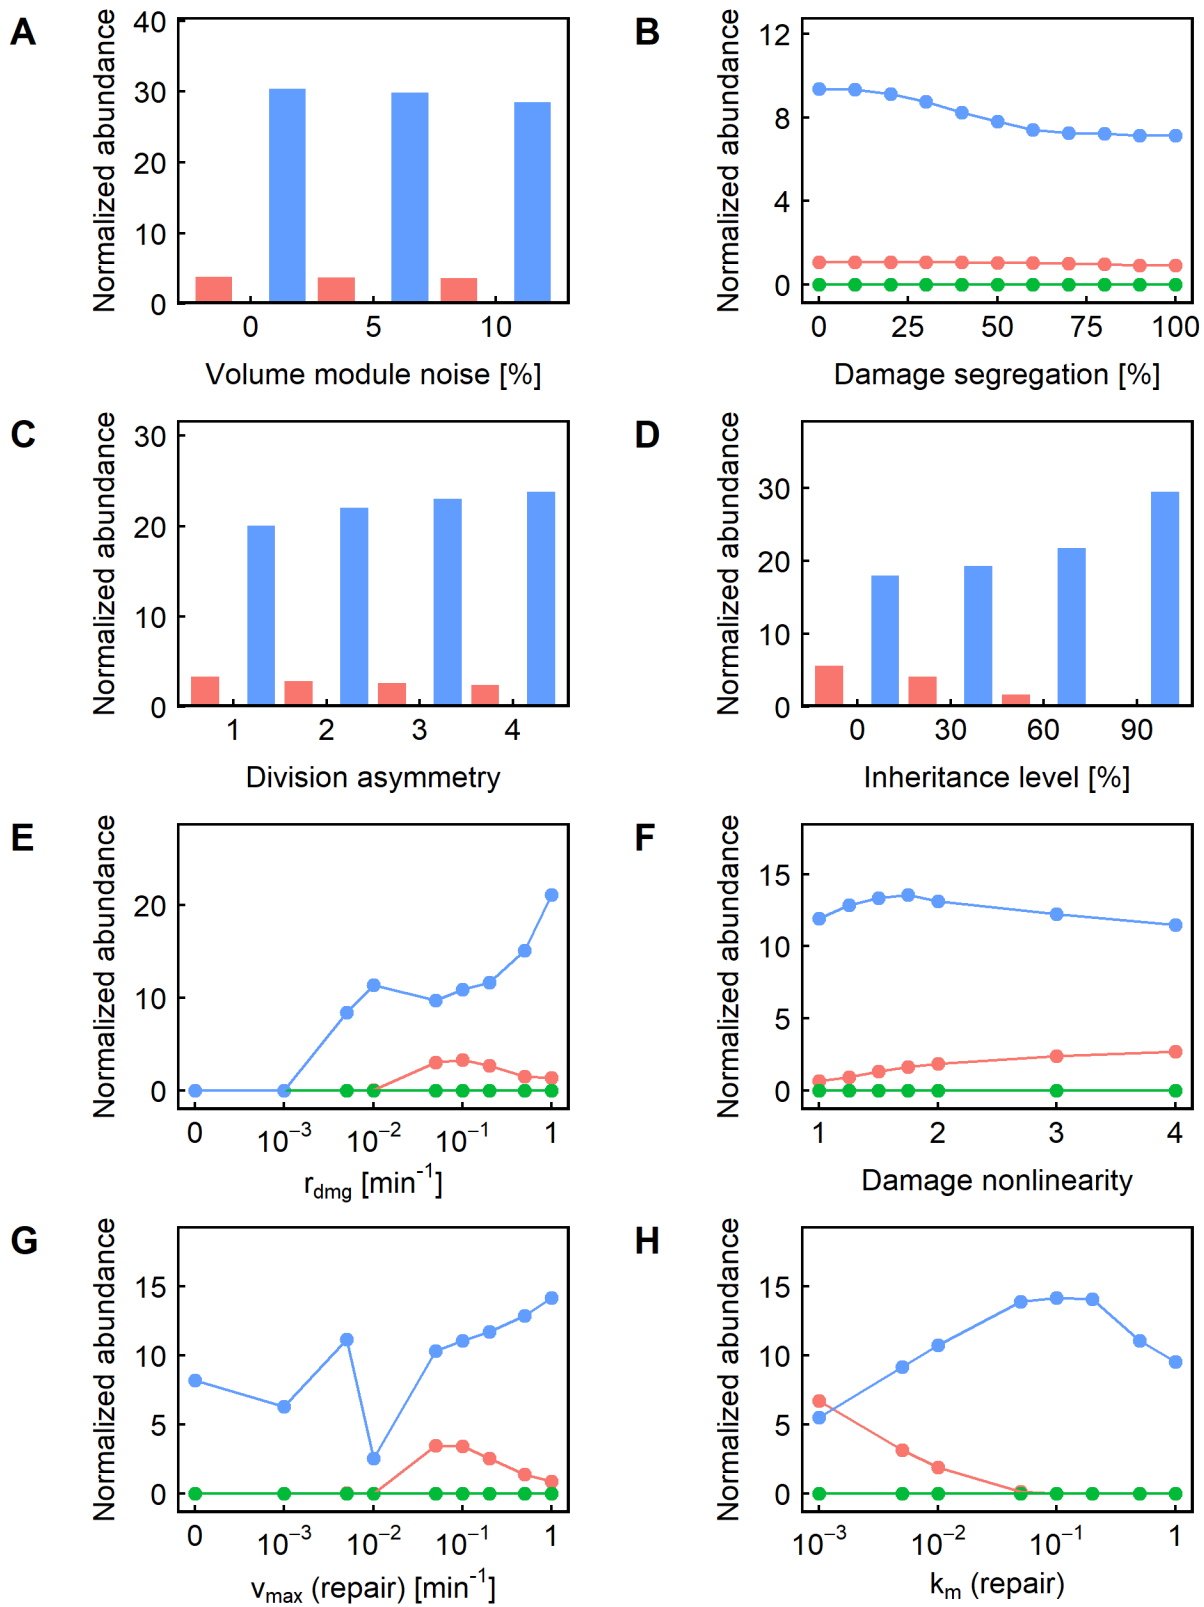

Figure 5

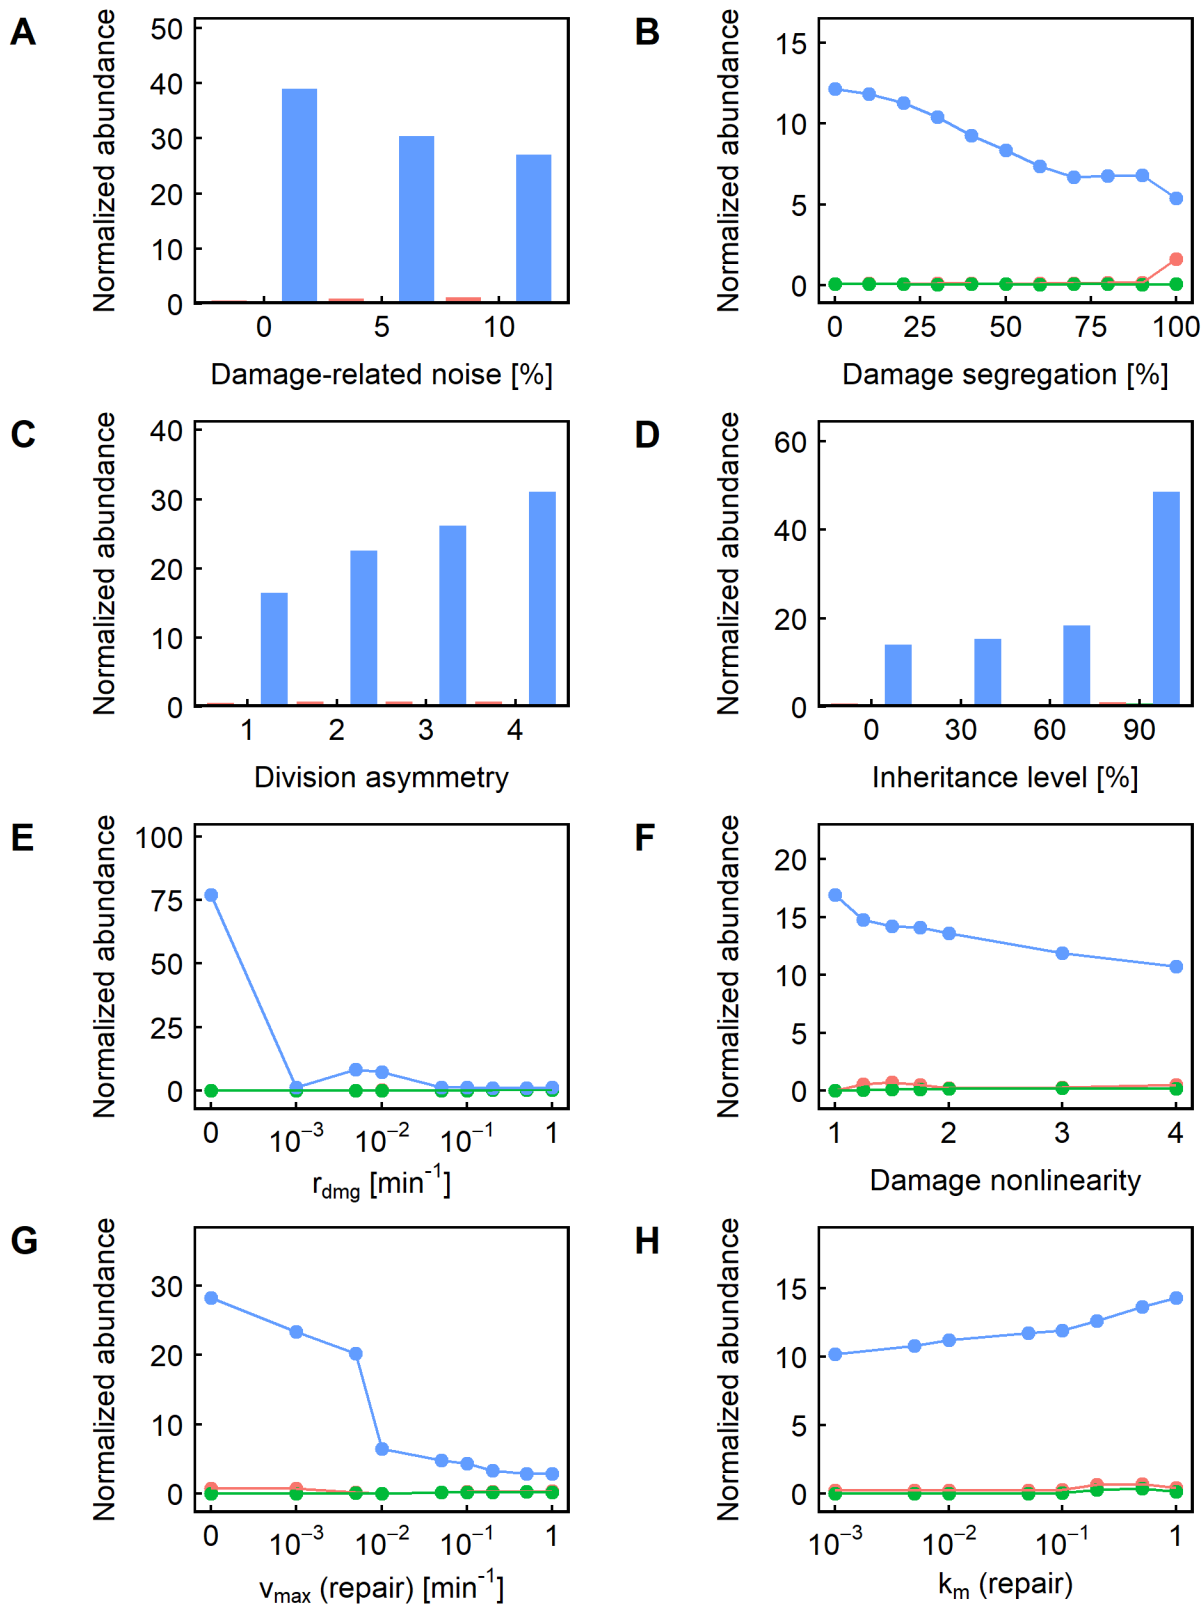

Figure 6

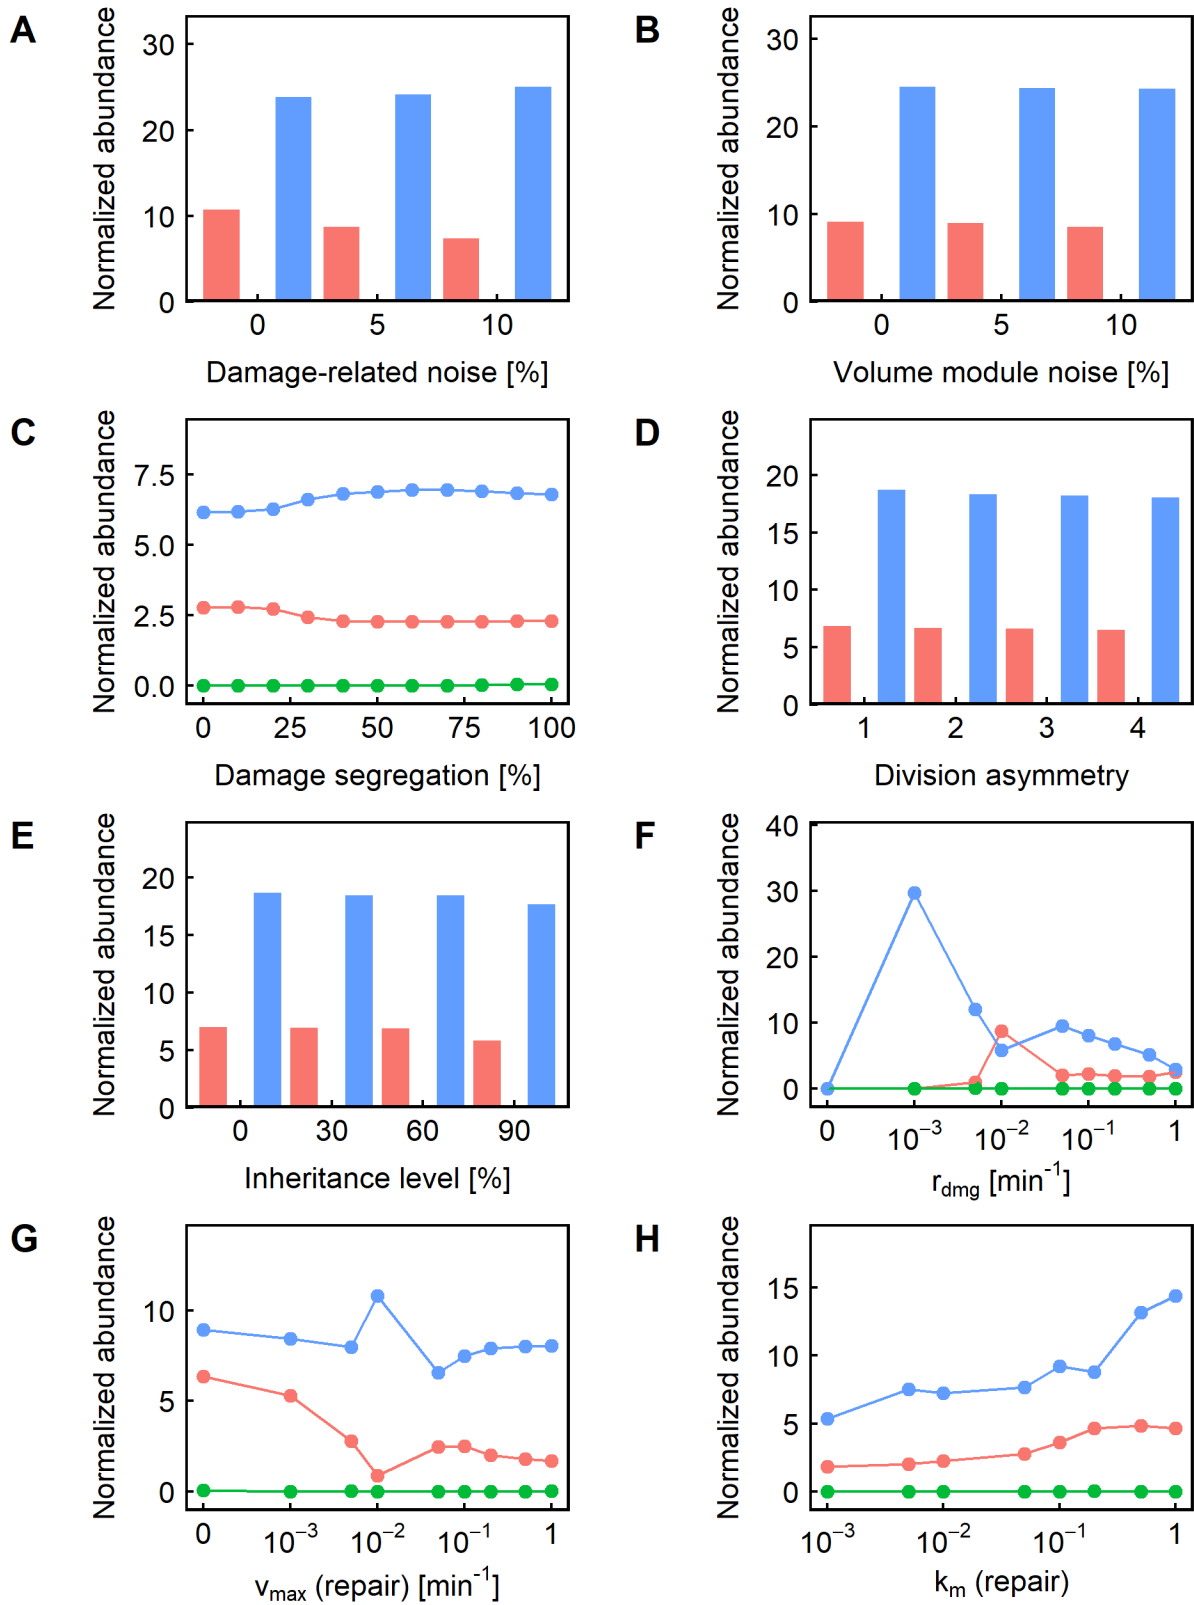

Figure 7
